# Supplementary material
Source: publisher figshare collection journal article supplement (https://sage.figshare.com/ndownloader/files/20161919)
Supplement: Supplementary file 1 [file 20161919]

We have provided our interview protocol below:

### **Trust Interview Protocol**

We want to talk about trust and its role in the health care system. As a physician, what do you think is the role of trust in the health care system?

- a. As a physician, in what relationships with the actors and entities you interact with is trust important?

Now we'd like to talk about trust, more specifically, trust in non-physician clinicians and Health Information Technology, such as the Electronic Health Record.

As a physician, how would you describe the role of trust as you interact with X?

- c. How do you know you can trust this entity?
- d. How do you know if this entity trusts you?
- f. What are the implications/ consequences of trust [high or low] in that relationship?
- g. What is the role of mistrust or skepticism, if any?
- h. How do you build and sustain trust with the entity?
- i. How does your relationship with this entity improve as trust grows?
- j. How does use of the EHR influence the role of trust in your relationships with other providers?

### **Conclusion**

- j. How often do you typically think about trust in the ways we just discussed?

[rarely, somewhat, often]
